# Supplementary material for: Centrosome associated genes pattern for risk sub-stratification in multiple myeloma
Source: Springer Nature journal article supplement (doi:10.1186/s12967-016-0906-9), 2016-05-27

**BARD1**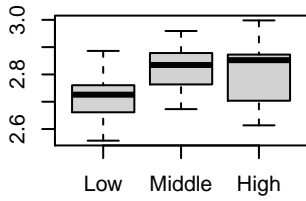**CDC25C.FAM53C**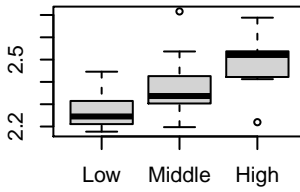**MAD2L1**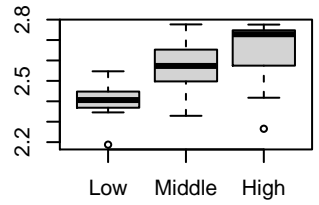**CENPA**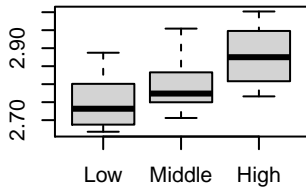**RAD51**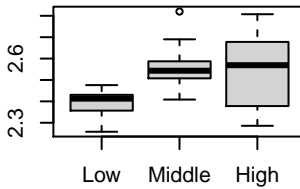**BUB1B.PAK6**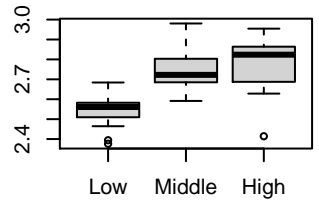**CENPH**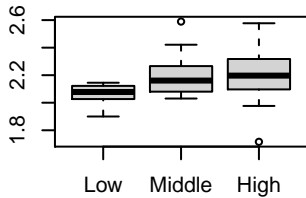**XRCC2**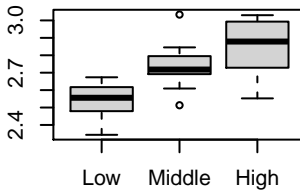**PLK1**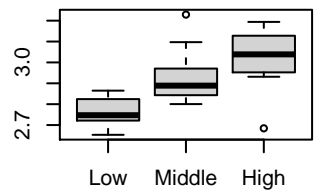**BRCA1**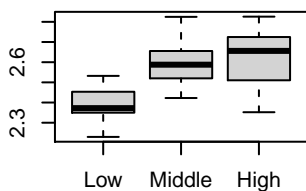**BUB1**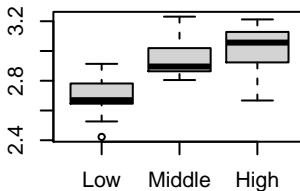**AURKA**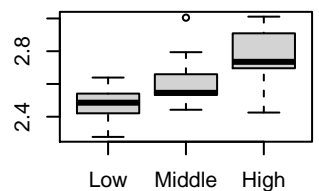

Supplement: MOESM1 [file 10208276]
